# Supplementary material
Source: publisher figshare collection journal article supplement (https://frontiersin.figshare.com/ndownloader/files/34733701)
Supplement: Supplementary file [file 34733701]

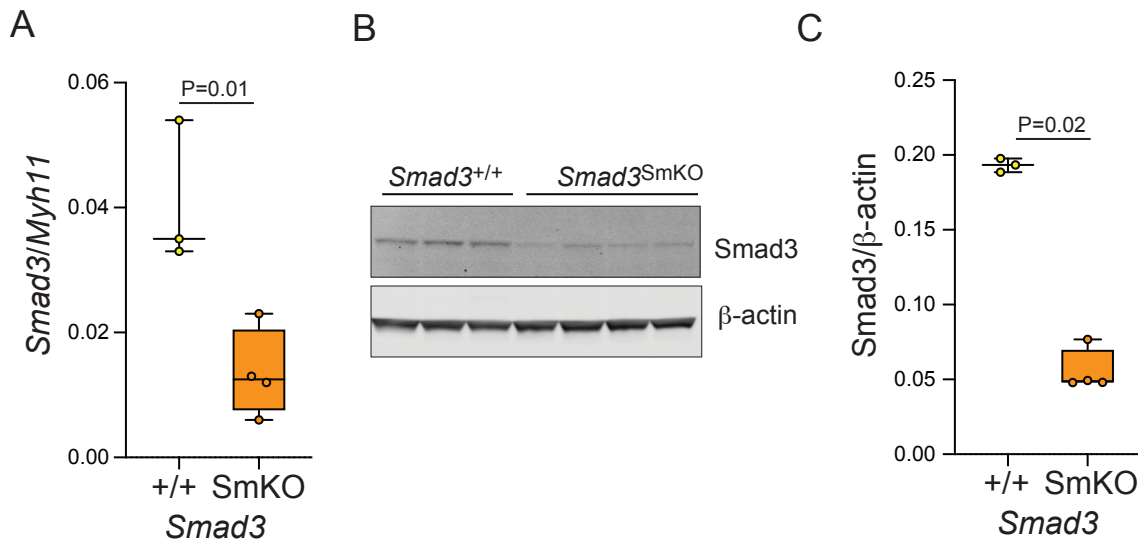

**Supplemental Figure 1. Validation of *Smad3* inactivation in *Smad3*<sup>SmKO</sup> mice by qPCR and immunoblot. (A)** qPCR analysis of *Smad3* relative to *Myh11* expression in the aortas of *Smad3*<sup>+/+</sup> (n=3) and *Smad3*<sup>SmKO</sup> (n=4) mice. **(B)** Immunoblot of Smad3 expression relative to β-actin in aortic lysates of *Smad3*<sup>+/+</sup> (n=3) and *Smad3*<sup>SmKO</sup> (n=4) mice. **(C)** Quantification of immunoblot shown in B. P-values refer to two tailed Student's t-test.
